# Supplementary material for: Moderate exercise improves function and increases adiponectin in the mdx mouse model of muscular dystrophy
Source: PubMed Central journal article supplement (PMC6453911; doi:10.1038/s41598-019-42203-z), 2019-04-08
Supplement: 41598_2019_42203_MOESM1_ESM.pdf [file 41598_2019_42203_MOESM1_ESM.pdf]

**SUPPLEMENTARY INFORMATION FOR**

**Moderate exercise improves function and increases adiponectin in the *mdx*  
mouse model of muscular dystrophy**

Aaron S. Zelikovich, Mattia Quattrocelli, Isabella M. Salamone, Nancy L. Kuntz, Elizabeth M.  
McNally

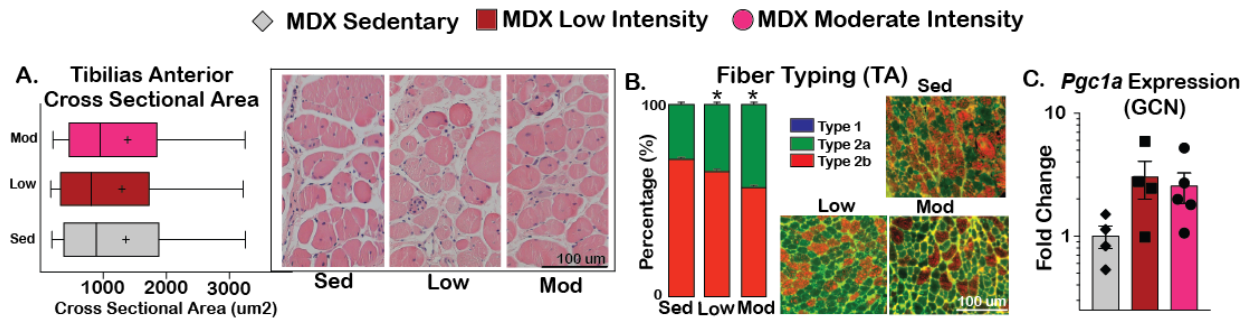

**Supplemental Figure 1. Exercise improved skeletal muscle function in *mdx* mice.** (A) TA cross sectional area was calculated from histological analysis and did not differ between exercise groups. (B) Exercise groups showed an incremental increase in the ratio of type 2a fibers (green) suggesting an adaptive response to oxidative capacity in the TA muscle. (C) Exercise groups showed a modest increase in *Pgc1a* gene expression in the gastrocnemius muscle, as quantitated by qPCR analysis of muscle tissue.

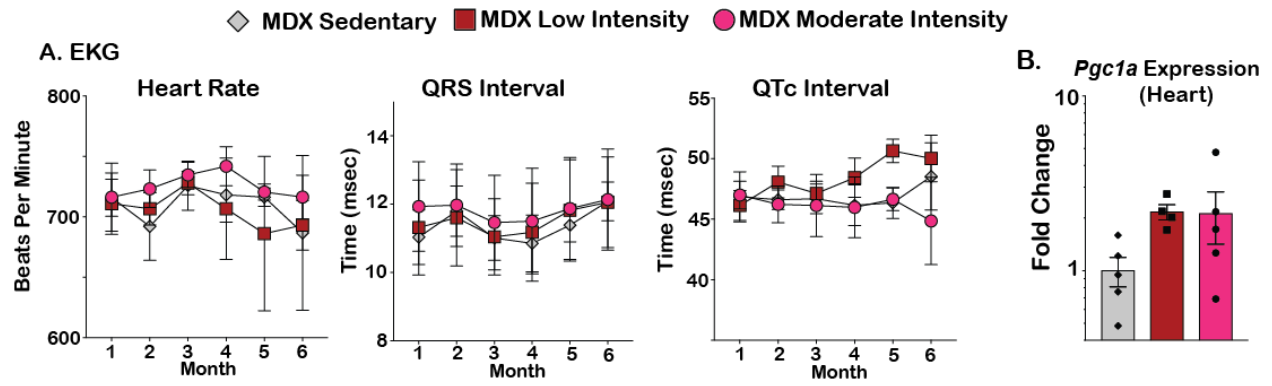

**Supplemental Figure 2. Exercise did not change EKG parameters and associated with a modest increase in *Pgc1a* expression in the heart.** (A) Heart rate, QRS, and QTc intervals were unchanged by exercise and were similar among the groups. (B) *Pgc1a* mRNA expression showed a modest increase in both exercise groups, as compared to the sedentary group.

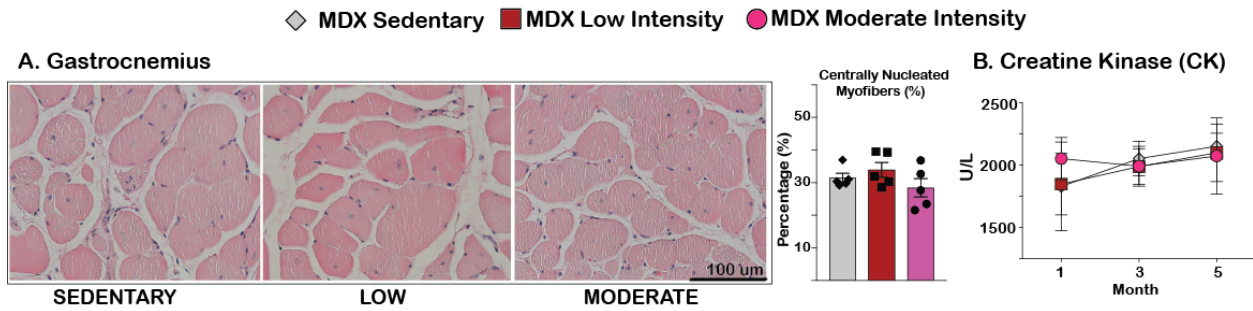

**Supplemental Figure 3. Exercise did not increase fraction of centrally nucleated myofibers or serum creatine kinase in *mdx* mice. (A)** Exercise did not increase the percentage of centrally nucleated myofibers in gastrocnemius muscle. **(B)** Serum CK levels remained similar in all groups throughout study suggesting that muscle membrane damage was not further increased by exercise.
